# Supplementary material for: Mixed-anion complexes with a bipyrazolyl ligand. A new entry to a realm of three-dimensional five-connected coordination topologiesElectronic supplementary information (ESI) available: crystal structure determination and refinement details for 1â€“4. See http://www.rsc.org/suppdata/cc/b1/b110599j/
Source: Royal Society of Chemistry journal article supplement (doi:10.1039/b110599j), 2002-02-13
Supplement: b110599j.doc [file b110599j.doc]

# Supplementary material

|  |
| --- |

**Mixed-Anion Complexes with a Bipyrazolyl Ligand:**

**A New Entry to a Realm of Three-Dimensional Five-Connected Coordination Topologies†**

|  |
| --- |

Vira V. Ponomarova,*a* Vasiliy V. Komarchuk,*a*  Ishtvan Boldog,*a* Alexander N. Chernega, *b*

Joachim Sieler *c* and Konstantin V. Domasevitch*****a* #

*a Inorganic Chemistry Department, Kiev University, Volodimirska Street 64, Kiev 01033,*

*Ukraine, # E-mail dk@anorgchemie.univ.kiev.ua*

*b**Institute of Organic Chemistry, Murmanskaya St.4, Kiev 253660, Ukraine*

*c Institut für Anorganische Chemie, Universität Leipzig, Linnéstraße 3,*

*D-04103 Leipzig, Deutschland*

*Crystallography:*

[Co2(4,4’-bpz)4(H2O)2{SO4}] (ClO4)2H2O **1**

[Ni2(4,4’-bpz)4(H2O)2{SO4}](NO3)2H2O **2**

[Co2(4,4’-bpz)4{SO4}{NCS}2]2CH3OH2CHCl3 **3**

[Ni2(4,4’-bpz)4{SO4}{NCS}2]2CH3OH2CHCl3 **4**

Crystallographic measurements were made at 223 K using a Siemens SMART CCD detector diffractometer. Graphite monochromated Mo-K radiation ( = 0.71073 Å) was employed, and the exposition time was 40 sec per frame for both structures. The essential experimental conditions and resulting crystal data are given in Tables. The data frames were integrated using SAINT and empirical absorption corrections (SADABS) were employed. The structures were solved by direct methods and refined by full-matrix least-squares techniques in the anisotropic approximation using SHELXS-86 and SHELXL-93.

**Scheme 1. Atom labelling scheme for structures 3 and 4 (unique part only, 40% ellipsoids)**

Hydrogens not shown

**Scheme 2. Atom labelling scheme for structure 1 (unique part only, 40% ellipsoids)**

Hydrogens not schown; Labelling (excluding disordered nitrate) in structure 2 is the same. For labelling of the nitrates see Scheme 6.

We note that structure **4** may be solved also in centrosymmetric group Pbca, and even refined to poor visibility of major structure features (the best R1 reached was 0.17). In this case SO4 group is disordered, solvate chloroform is totally disordered and the most of atoms have very poor thermal parameters. In fact, this example may be discussed in terms of superstructure, when the absolute majority of the atoms in structure satisfy demands of inversion symmetry and only specific location of several atoms (or even one atom) forbids assignment of centrosymmetric space group and leads to doubling of the structure unique part or doubling the unit cell volume. Exactly the same situation is present in structure 4: coordinates of many corresponding atom pairs (e.g. Ni(1) and Ni(2), N(17) and N(18), etc) are related as x2-x1=0.5, y1+y2=1, z1=z2, suggesting presence of extra center of inversion and space group Pbca (Z = 8) instead of P212121 (Z = 4), and for the Pbca space group two present unique metal atom will appear to be symmetry equivalents related by center of inversion. This pattern, however, is impossible from clear chemical reason: two unique metal atoms are bridged by tetrahedral sulfate group, which is inherently acentric. It appears to be quite important that this sulfate group is ***ordered*** and all the SO4 atoms possess normal thermal parameters, while assignment of inversion symmetry in present case requires disordering of O-S-O linkage in this bridge (that was really observed for centrosymmetric structures 1 and 2!):

These compounds 3,4 crystallize in chiral space group P212121. We were not successful in determination of the absolute structure and the Flack x parameter refinement led to ca. 0.5 values that are suggestive of racemic twinning. Both the structures were refined by SHELXL93 as racemic twins using TWIN / BASF options and the Flack x parameters in CIF files represent the refined batch scale factors.

**Treatment of disorder and hydrogen atoms in structures**

[Co2(4,4’-bpz)4(H2O)2{SO4}] (ClO4)2H2O **1** and[Ni2(4,4’-bpz)4(H2O)2{SO4}](NO3)2H2O **2**

Both structures possess tetragonal symmetry; the metal atoms coordinate four pyrazolyl groups and are situated on a four-fold axis. Thus the fragments H2O-M-O-S(O2)-O-M-OH2 involving sulfate bridges possess four-fold symmetry and only metal atoms, oxygen atoms of water molecules and coordinated sulfate oxygens are ordered, while SO2 linkage is disordered in such a way that sulfur atom is disordered over four positions, and oxygen atom (O3) – over two positions as each of these two positions corresponds to two possible orientations of sulfur atom (See Scheme 1). Solvate non-coordinated water molecule is also disordered over four-fold axis and situated also in this region. This molecule evidently is

involved into weak hydrogen bonding with pyrazolyl NH groups and sulfate oxygen and orientation of this molecule depends on orientation of sulfate. The principal diagram is shown in Scheme 2. Refinement

of this model gave reasonable U values for all disordered atoms (U(eq) 0.022-0.055 Å2) and in general roughly reasonable geometry of sulfate: all angles OSO in a 100-120o range, S-O separations: 1.37-1.59 Å. No constraints in bonds distances and angles were employed.

In structure [Co2(4,4’-bpz)4(H2O)2{SO4}] (ClO4)2H2O **1** perchlorate counter anions are not coordinated, they located in cages of 3D coordination network and form series of weak H-bonds with

|  |  | |
| --- | --- | --- |
| **Scheme 3**  Mode of disordering of SO4 anion over four fold axis. One of four possible orientations is shown with black bond lines. | **Scheme 4**  Diagram for metal-sulfate connectivity showing one of four mutual orientation of sulfate anion and solvate water with possible H-bonding. | |
|  | |  |
| **Scheme 5**  Structure 1: Two perchlorate gpoups are disordered over eight positions over four-fold axis. | | **Scheme 6**  Disordering of two nitrate groups over eight positions in structure **2**. |

coordinated and non-coordinated water molecules (with O---O at ca. 2.95 Å). These perchlorates (two equivalents per metal atom) appeared also to be disordered over two unique positions, both near four-fold

axis. Thus two perchlorate groups are disordered over eight positions. Refinement of this model (See scheme 3) proceeded smoothly and therefore it was possible to refine all perchlorate atoms anisotropically; resulting geometry was reasonable – Cl-O1.30-1.42 Å, O-Cl-O 100-118o, U(eq) 0.051-0.22 Å. No constraints were employed. The nitrate groups in structure [Ni2(4,4’-bpz)4(H2O)2{SO4}] (NO3)2H2O **2** are also located in the cages, and are disordered similarly to perchlorates in **1** (Scheme 4). Two orientations of NO3 groups possess one common oxygen atoms; the atoms were refined with corresponding occupancy factors. For improving the refinement stability the geometry of disordered nitrates was fixed, with N-O distances at 1.23(2) Å, angles O-N-O at 120o, and all these atom were refined isotropically only.

In this structures (1 and 2) the hydrogen atoms of NH and CH3 groups were idealized and included in calculations with their U(iso) values 1.2 times greater then the U(eq) value of corresponding carbon (nitrogen) atom. Hydrogen atoms of disordered water molecule were not included; Coordinated water molecules lie on a four-fold axis and corresponding hydrogens are disordered; they also were not included.

**Disorder and hydrogen atoms in structures** [Co2(4,4’-bpz)4{SO4}{NCS}2]2CH3OH2CHCl3 **3**

and [Ni2(4,4’-bpz)4{SO4}{NCS}2]2CH3OH2CHCl3 **4**

Structures **3,4** include enclathrated chloroform molecules; their chlorine atoms possess high U values and display anisotropy of thermal motion suggesting possible “rotational” disorder of these molecules.

We were not successful to resolve this possible disorder for structure **3.** No geometrical restraints were employed, resulting C-Cl bond lengths were 1.55-1.87 Å, for chlorine atoms U(eq) 0.11-0.18 Å2.

For structure **4**, for one of two unique chloroform molecules, it was possible to divide the positions of chlorine atoms (see scheme) and to refine them with partial occupancies at 0.55 and 0.45. The orientations of two components are related by ca. 15o; for the sake of overall convergence the chlorine atoms were refined anisotropically; resulting geometry for this disordered molecule was reasonable with C-Cl at 1.71-1.76 Å. No geometry constraints were used.

|  | Scheme 7 Refined disordering model for chloroform of crystallization in structure 4. |
| --- | --- |

In these structures, all NH, CH3 (bipyrazolyl and solvate methanol) and CH (chloroform) hydrogen atoms were idealized and included in calculations with their U(iso) 1.2 times greater then U(eq) parameter of corresponding carbon (nitrogen) atom. OH hydrogen atoms of solvate methanol molecules were not included.

**Table 1. Crystal data and structure refinement for 1.**

Identification code c1024

Empirical formula C40 H62 Cl2 Co2 N16 O15 S

Formula weight 1227.88

Temperature 223(2) K

Wavelength 0.71073 A

Crystal system Tetragonal

Space group P4/mnc

Unit cell dimensions a = 13.7588(9) A alpha = 90 deg.

b = 13.7588(9) A beta = 90 deg.

c = 16.7261(14) A gamma = 90 deg.

Volume 3166.3(4) A^3

Z 2

Density (calculated) 1.288 Mg/m^3

Absorption coefficient 0.708 mm^-1

F(000) 1276

Crystal size 0.45 x 0.37 x 0.25 mm

Theta range for data collection 1.92 to 28.88 deg.

Index ranges -18<=h<=17, -16<=k<=18, -22<=l<=20

Reflections collected 19462

Independent reflections 2070 [R(int) = 0.0244]

Refinement method Full-matrix least-squares on F^2

Data / restraints / parameters 1680 / 0 / 145

Goodness-of-fit on F^2 1.054

Final R indices [I>2sigma(I)] R1 = 0.0440, wR2 = 0.1196

R indices (all data) R1 = 0.0778, wR2 = 0.2066

Largest diff. peak and hole 0.667 and -0.283 e.A^-3

**Table 2. Atomic coordinates ( x 10^4) and equivalent isotropic**

**displacement parameters (A^2 x 10^3) for 1. U(eq) is defined**

**as one third of the trace of the orthogonalized Uij tensor.**

________________________________________________________________

x y z U(eq)

________________________________________________________________

Co(1) 0 0 1961(1) 24(1)

S(1) 368(2) 335(2) 0 22(1)

O(1) 0 0 3244(2) 52(1)

O(2) 0 0 710(2) 47(1)

O(3) 213(6) 1385(4) 0 55(2)

N(1) 896(1) -1280(1) 1942(1) 30(1)

N(2) 575(1) -2042(1) 1500(1) 35(1)

C(1) 1582(2) -1646(2) 2419(1) 33(1)

C(2) 1681(1) -2653(1) 2292(1) 32(1)

C(3) 1027(2) -2873(2) 1692(2) 38(1)

C(4) 801(3) -3813(2) 1292(3) 72(1)

C(5) 2166(2) -1039(2) 2979(2) 58(1)

Cl(1) 3368(3) -2029(3) 5000 51(1)

O(4) 2377(14) -2315(17) 5000 94(6)

O(5) 3746(8) -2299(14) 5741(7) 102(4)

O(6) 3456(22) -1089(15) 5000 121(8)

Cl(1A) 1840(6) 267(6) 5000 91(2)

O(4A) 2724(15) -149(18) 5000 101(5)

O(5A) 1569(11) 698(10) 4302(5) 95(4)

O(6A) 1178(25) -505(31) 5000 224(27)

O(7) 1958(7) -685(6) 0 35(2)

________________________________________________________________

**Table 3. Bond lengths [A] and angles [deg] for 1.**

_____________________________________________________________

| Co(1)-O(2) 2.092(3)  Co(1)-O(1) 2.146(4)  Co(1)-N(1)#1 2.150(2)  Co(1)-N(1)#2 2.150(2)  Co(1)-N(1) 2.150(2)  Co(1)-N(1)#3 2.150(2)  S(1)-S(1)#2 0.968(4)  S(1)-S(1)#4 0.968(4)  S(1)-S(1)#5 1.369(5)  S(1)-O(2) 1.371(3)  S(1)-O(2)#5 1.371(3)  S(1)-O(3) 1.461(6)  S(1)-O(3)#4 1.589(7)  O(2)-S(1)#5 1.371(3)  O(2)-S(1)#4 1.371(3)  O(2)-S(1)#2 1.371(3)  O(3)-O(7)#2 1.021(10)  O(3)-S(1)#2 1.589(7)  N(1)-C(1) 1.334(3)  N(1)-N(2) 1.356(2)  N(2)-C(3) 1.341(3) | C(1)-C(2) 1.408(3)  C(1)-C(5) 1.490(3)  C(2)-C(3) 1.382(3)  C(2)-C(2)#6 1.471(4)  C(3)-C(4) 1.488(4)  Cl(1)-O(6) 1.30(2)  Cl(1)-O(5)#7 1.394(11)  Cl(1)-O(5) 1.394(11)  Cl(1)-O(4) 1.42(2)  Cl(1)-O(7)#6 1.908(10)  O(5)-O(7)#6 1.79(2)  O(6)-O(4A) 1.64(4)  Cl(1A)-O(4A) 1.34(2)  Cl(1A)-O(5A)#7 1.362(12)  Cl(1A)-O(5A) 1.362(12)  Cl(1A)-O(6A) 1.40(4)  O(7)-O(3)#4 1.021(10)  O(7)-O(5)#8 1.79(2)  O(7)-O(5)#6 1.79(2)  O(7)-Cl(1)#6 1.908(10) |
| --- | --- |

| O(2)-Co(1)-O(1) 180.0  O(2)-Co(1)-N(1)#1 89.17(5)  O(1)-Co(1)-N(1)#1 90.83(5)  O(2)-Co(1)-N(1)#2 89.17(5)  O(1)-Co(1)-N(1)#2 90.83(5)  N(1)#1-Co(1)-N(1)#2 178.35(9)  O(2)-Co(1)-N(1) 89.17(5)  O(1)-Co(1)-N(1) 90.83(5)  N(1)#1-Co(1)-N(1) 89.988(1)  N(1)#2-Co(1)-N(1) 89.988(1)  O(2)-Co(1)-N(1)#3 89.17(5)  O(1)-Co(1)-N(1)#3 90.83(5)  N(1)#1-Co(1)-N(1)#3 89.988(1)  N(1)#2-Co(1)-N(1)#3 89.988(1)  N(1)-Co(1)-N(1)#3 178.35(9)  S(1)#2-S(1)-S(1)#4 90.0  S(1)#2-S(1)-S(1)#5 45.0  S(1)#4-S(1)-S(1)#5 45.0  S(1)#2-S(1)-O(2) 69.32(7)  S(1)#4-S(1)-O(2) 69.32(7)  S(1)#5-S(1)-O(2) 60.04(11)  S(1)#2-S(1)-O(2)#5 69.32(8)  S(1)#4-S(1)-O(2)#5 69.32(8)  S(1)#5-S(1)-O(2)#5 60.04(11)  O(2)-S(1)-O(2)#5 120.1(2)  S(1)#2-S(1)-O(3) 78.9(5)  S(1)#4-S(1)-O(3) 168.9(5)  S(1)#5-S(1)-O(3) 123.9(5)  O(2)-S(1)-O(3) 106.2(2)  O(2)#5-S(1)-O(3) 106.2(2)  S(1)#2-S(1)-O(3)#4 154.4(4)  S(1)#4-S(1)-O(3)#4 64.4(4)  S(1)#5-S(1)-O(3)#4 109.4(4)  O(2)-S(1)-O(3)#4 99.6(2)  O(2)#5-S(1)-O(3)#4 99.6(2)  O(3)-S(1)-O(3)#4 126.7(2)  S(1)#4-O(2)-S(1)#2 59.9(2)  S(1)#5-O(2)-S(1) 59.9(2)  S(1)#4-O(2)-S(1) 41.4(2)  S(1)#2-O(2)-S(1) 41.4(2) | S(1)#5-O(2)-Co(1) 150.04(11)  S(1)#4-O(2)-Co(1) 150.04(11)  S(1)#2-O(2)-Co(1) 150.04(11)  S(1)-O(2)-Co(1) 150.04(11)  O(7)#2-O(3)-S(1) 132.2(8)  O(7)#2-O(3)-S(1)#2 168.9(8)  S(1)-O(3)-S(1)#2 36.7(2)  C(1)-N(1)-N(2) 105.3(2)  C(1)-N(1)-Co(1) 134.91(14)  N(2)-N(1)-Co(1) 117.06(12)  C(3)-N(2)-N(1) 112.3(2)  N(1)-C(1)-C(2) 110.5(2)  N(1)-C(1)-C(5) 123.1(2)  C(2)-C(1)-C(5) 126.4(2)  C(3)-C(2)-C(1) 105.2(2)  C(3)-C(2)-C(2)#6 127.8(2)  C(1)-C(2)-C(2)#6 127.0(2)  N(2)-C(3)-C(2) 106.7(2)  N(2)-C(3)-C(4) 122.5(2)  C(2)-C(3)-C(4) 130.8(2)  O(6)-Cl(1)-O(5)#7 103.3(10)  O(6)-Cl(1)-O(5) 103.3(10)  O(5)#7-Cl(1)-O(5) 125.5(13)  O(6)-Cl(1)-O(4) 112(2)  O(5)#7-Cl(1)-O(4) 106.5(7)  O(5)-Cl(1)-O(4) 106.5(7)  O(6)-Cl(1)-O(7)#6 131.6(14)  O(4)-Cl(1)-O(7)#6 117.0(11)  Cl(1)-O(5)-O(7)#6 72.5(7)  Cl(1)-O(6)-O(4A) 137(2)  O(4A)-Cl(1A)-O(5A)#7 115.7(7)  O(4A)-Cl(1A)-O(5A) 115.7(7)  O(5A)#7-Cl(1A)-O(5A) 118.1(11)  O(4A)-Cl(1A)-O(6A) 105(2)  O(5A)#7-Cl(1A)-O(6A) 98.7(11)  O(5A)-Cl(1A)-O(6A) 98.7(11)  Cl(1A)-O(4A)-O(6) 153(2)  O(3)#4-O(7)-O(5)#8 136.1(5)  O(3)#4-O(7)-O(5)#6 136.1(5)  O(5)#8-O(7)-O(5)#6 87.8(9) |
| --- | --- |

_____________________________________________________________

Symmetry transformations used to generate equivalent atoms:

#1 y,-x,z #2 -y,x,z #3 -x,-y,z #4 y,-x,-z #5 -x,-y,-z

#6 y+1/2,x-1/2,-z+1/2 #7 x,y,-z+1 #8 y+1/2,x-1/2,z-1/2

**Table 4. Anisotropic displacement parameters (A^2 x 10^3) for 1.**

**The anisotropic displacement factor exponent takes the form:**

**-2 pi^2 [ h^2 a*^2 U11 + ... + 2 h k a* b* U12 ]**

_______________________________________________________________________

U11 U22 U33 U23 U13 U12

_______________________________________________________________________

Co(1) 25(1) 25(1) 23(1) 0 0 0

S(1) 25(2) 21(2) 20(1) 0 0 -1(1)

O(1) 64(2) 64(2) 29(2) 0 0 0

O(2) 59(1) 59(1) 23(1) 0 0 0

O(3) 112(5) 26(2) 25(2) 0 0 8(3)

N(1) 30(1) 26(1) 35(1) 0(1) -9(1) 0(1)

N(2) 34(1) 28(1) 42(1) -3(1) -13(1) 2(1)

C(1) 32(1) 30(1) 37(1) 2(1) -9(1) 2(1)

C(2) 28(1) 28(1) 40(1) 4(1) -5(1) 1(1)

C(3) 33(1) 29(1) 51(1) -2(1) -11(1) 2(1)

C(4) 83(2) 35(1) 97(2) -17(1) -43(2) 10(1)

C(5) 65(2) 41(1) 68(2) -9(1) -41(1) 9(1)

Cl(1) 41(2) 86(3) 28(1) 0 0 1(2)

O(4) 90(11) 132(15) 60(8) 0 0 -44(11)

O(5) 64(6) 168(13) 74(7) 24(7) -23(5) -15(7)

O(6) 163(21) 75(11) 125(16) 0 0 -31(13)

Cl(1A) 100(4) 134(5) 40(2) 0 0 11(4)

O(4A) 77(11) 132(16) 93(11) 0 0 1(11)

O(5A) 128(10) 118(9) 39(4) -25(5) -35(5) 13(8)

O(6A) 105(19) 131(24) 437(88) 0 0 -31(17)

O(7) 30(4) 34(4) 41(4) 0 0 5(3)

_______________________________________________________________________

**Table 5. Hydrogen coordinates ( x 10^4) and isotropic**

**displacement parameters (A^2 x 10^3) for 1.**

________________________________________________________________

x y z U(eq)

________________________________________________________________

H(2A) 112(1) -1995(1) 1122(1) 42

H(4A) 304(3) -3717(2) 896(3) 86

H(4B) 1377(3) -4060(2) 1039(3) 86

H(4C) 578(3) -4270(2) 1684(3) 86

H(5A) 1943(2) -378(2) 2954(2) 70

H(5B) 2098(2) -1277(2) 3515(2) 70

H(5C) 2836(2) -1067(2) 2823(2) 70

________________________________________________________________

**Table 6. Crystal data and structure refinement for 2.**

Identification code c1026

Empirical formula C40 H62 N18 Ni2 O13 S

Formula weight 1152.56

Temperature 223(2) K

Wavelength 0.71073 A

Crystal system Tetragonal

Space group P4/mnc

Unit cell dimensions a = 13.6542(13) A alpha = 90 deg.

b = 13.6542(13) A beta = 90 deg.

c = 16.477(2) A gamma = 90 deg.

Volume 3071.9(5) A^3

Z 2

Density (calculated) 1.246 Mg/m^3

Absorption coefficient 0.713 mm^-1

F(000) 1208

Crystal size 0.22 x 0.22 x 0.12 mm

Theta range for data collection 1.94 to 27.09 deg.

Index ranges -17<=h<=17, -17<=k<=15, -10<=l<=21

Reflections collected 8138

Independent reflections 1129 [R(int) = 0.0461]

Refinement method Full-matrix least-squares on F^2

Data / restraints / parameters 1021 / 8 / 108

Goodness-of-fit on F^2 1.370

Final R indices [I>2sigma(I)] R1 = 0.0801, wR2 = 0.1836

R indices (all data) R1 = 0.1098, wR2 = 0.3476

Extinction coefficient 0.017(7)

Largest diff. peak and hole 0.690 and -0.367 e.A^-3

**Table 7. Atomic coordinates ( x 10^4) and equivalent isotropic**

**displacement parameters (A^2 x 10^3) for 2. U(eq) is defined**

**as one third of the trace of the orthogonalized Uij tensor.**

________________________________________________________________

x y z U(eq)

________________________________________________________________

Ni(1) 0 0 3017(1) 36(1)

O(1) 0 0 1732(6) 75(3)

S(1) 291(7) 475(6) 5000 29(2)

O(2) 0 0 4281(5) 44(2)

O(3) 1445(11) 320(18) 5000 76(7)

N(1) 869(4) 1267(4) 3040(3) 38(1)

N(2) 551(4) 2035(4) 3494(3) 39(1)

C(1) 1011(5) 2873(5) 3314(4) 43(2)

C(2) 1666(5) 2655(5) 2702(4) 40(2)

C(3) 1561(5) 1650(5) 2556(4) 44(2)

C(4) 2145(8) 1047(7) 1986(7) 77(3)

C(5) 786(8) 3813(6) 3736(7) 77(3)

O(4) -2034(15) -705(12) 5000 11(4)

N(3) 3194(38) 4568(35) 5000 98(16)

N(3A) 2061(28) 5930(28) 5000 131(23)

O(8) 3389(29) 4208(29) 5661(18) 115(11)

O(6) 1192(25) 5836(33) 5000 102(13)

O(7) 2420(42) 6734(29) 5000 180(30)

O(5) 2575(26) 5219(29) 5000 177(15)

________________________________________________________________

**Table 8. Bond lengths [A] and angles [deg] for 2.**

_____________________________________________________________

| Ni(1)-O(2) 2.084(8)  Ni(1)-N(1) 2.098(5)  Ni(1)-N(1)#1 2.098(5)  Ni(1)-N(1)#2 2.098(5)  Ni(1)-N(1)#3 2.098(5)  Ni(1)-O(1) 2.118(10)  S(1)-S(1)#4 1.075(11)  S(1)-S(1)#3 1.075(11)  S(1)-O(2) 1.407(8)  S(1)-O(2)#5 1.407(8)  S(1)-S(1)#5 1.52(2)  S(1)-O(3)#3 1.57(2)  S(1)-O(3) 1.59(2)  O(2)-S(1)#4 1.407(8)  O(2)-S(1)#3 1.407(8)  O(2)-S(1)#5 1.407(8) | O(3)-O(4)#5 0.96(2)  O(3)-S(1)#4 1.57(2)  N(1)-C(3) 1.343(8)  N(1)-N(2) 1.360(7)  N(2)-C(1) 1.338(9)  C(1)-C(2) 1.380(10)  C(1)-C(5) 1.492(11)  C(2)-C(3) 1.401(10)  C(2)-C(2)#6 1.470(13)  C(3)-C(4) 1.481(11)  N(3)-O(8)#7 1.22(2)  N(3)-O(8) 1.22(2)  N(3)-O(5) 1.23(2)  N(3A)-O(6) 1.19(2)  N(3A)-O(5) 1.20(2)  N(3A)-O(7) 1.20(2) |
| --- | --- |

| O(2)-Ni(1)-N(1) 88.9(2)  O(2)-Ni(1)-N(1)#1 88.9(2)  N(1)-Ni(1)-N(1)#1 89.981(6)  O(2)-Ni(1)-N(1)#2 88.9(2)  N(1)-Ni(1)-N(1)#2 177.9(3)  N(1)#1-Ni(1)-N(1)#2 89.981(6)  O(2)-Ni(1)-N(1)#3 88.9(2)  N(1)-Ni(1)-N(1)#3 89.981(6)  N(1)#1-Ni(1)-N(1)#3 177.9(3)  N(1)#2-Ni(1)-N(1)#3 89.981(6)  O(2)-Ni(1)-O(1) 180.0  N(1)-Ni(1)-O(1) 91.1(2)  N(1)#1-Ni(1)-O(1) 91.1(2)  N(1)#2-Ni(1)-O(1) 91.1(2)  N(1)#3-Ni(1)-O(1) 91.1(2)  S(1)#4-S(1)-S(1)#3 90.0  S(1)#4-S(1)-O(2) 67.5(2)  S(1)#3-S(1)-O(2) 67.5(2)  S(1)#4-S(1)-O(2)#5 67.5(2)  S(1)#3-S(1)-O(2)#5 67.5(2)  O(2)-S(1)-O(2)#5 114.6(6)  S(1)#4-S(1)-S(1)#5 45.000(3)  S(1)#3-S(1)-S(1)#5 45.000(1)  O(2)-S(1)-S(1)#5 57.3(3)  O(2)#5-S(1)-S(1)#5 57.3(3)  S(1)#4-S(1)-O(3)#3 161.3(13)  S(1)#3-S(1)-O(3)#3 71.3(12)  O(2)-S(1)-O(3)#3 103.9(6)  O(2)#5-S(1)-O(3)#3 103.9(6)  S(1)#5-S(1)-O(3)#3 116.3(12)  S(1)#4-S(1)-O(3) 68.8(13)  S(1)#3-S(1)-O(3) 158.8(13)  O(2)-S(1)-O(3) 102.6(7)  O(2)#5-S(1)-O(3) 102.6(7)  S(1)#5-S(1)-O(3) 113.8(13) | O(3)#3-S(1)-O(3) 129.8(7)  S(1)-O(2)-S(1)#4 44.9(4)  S(1)-O(2)-S(1)#3 44.9(4)  S(1)#4-O(2)-S(1)#3 65.4(6)  S(1)-O(2)-S(1)#5 65.4(6)  S(1)#4-O(2)-S(1)#5 44.9(4)  S(1)#3-O(2)-S(1)#5 44.9(4)  S(1)-O(2)-Ni(1) 147.3(3)  S(1)#4-O(2)-Ni(1) 147.3(3)  S(1)#3-O(2)-Ni(1) 147.3(3)  S(1)#5-O(2)-Ni(1) 147.3(3)  O(4)#5-O(3)-S(1)#4 179(2)  O(4)#5-O(3)-S(1) 139(3)  S(1)#4-O(3)-S(1) 39.8(7)  C(3)-N(1)-N(2) 104.5(5)  C(3)-N(1)-Ni(1) 135.1(5)  N(2)-N(1)-Ni(1) 117.7(4)  C(1)-N(2)-N(1) 112.8(5)  N(2)-C(1)-C(2) 106.4(6)  N(2)-C(1)-C(5) 122.3(6)  C(2)-C(1)-C(5) 131.3(7)  C(1)-C(2)-C(3) 105.7(6)  C(1)-C(2)-C(2)#6 127.1(6)  C(3)-C(2)-C(2)#6 127.2(6)  N(1)-C(3)-C(2) 110.6(6)  N(1)-C(3)-C(4) 122.6(7)  C(2)-C(3)-C(4) 126.7(6)  O(8)#7-N(3)-O(8) 126(5)  O(8)#7-N(3)-O(5) 116(3)  O(8)-N(3)-O(5) 116(3)  O(6)-N(3A)-O(5) 120(2)  O(6)-N(3A)-O(7) 120(2)  O(5)-N(3A)-O(7) 120(2)  N(3A)-O(5)-N(3) 172(4) |
| --- | --- |

_____________________________________________________________

Symmetry transformations used to generate equivalent atoms:

#1 y,-x,z #2 -x,-y,z #3 -y,x,z #4 y,-x,-z+1 #5 -x,-y,-z+1

#6 -y+1/2,-x+1/2,-z+1/2 #7 x,y,-z+1

**Table 9. Anisotropic displacement parameters (A^2 x 10^3) for 2.**

**The anisotropic displacement factor exponent takes the form:**

**-2 pi^2 [ h^2 a*^2 U11 + ... + 2 h k a* b* U12 ]**

_______________________________________________________________________

U11 U22 U33 U23 U13 U12

_______________________________________________________________________

Ni(1) 41(1) 41(1) 27(1) 0 0 0

O(1) 96(6) 96(6) 32(5) 0 0 0

S(1) 35(6) 29(6) 23(3) 0 0 3(4)

O(2) 52(3) 52(3) 27(4) 0 0 0

O(3) 30(7) 176(21) 21(6) 0 0 19(10)

N(1) 42(3) 34(3) 39(3) -2(3) 13(3) 0(2)

N(2) 38(3) 37(3) 42(3) 1(2) 14(2) 5(2)

C(1) 39(3) 41(4) 48(4) 1(3) 9(3) 2(3)

C(2) 38(4) 34(3) 48(4) 6(3) 10(3) 5(3)

C(3) 41(4) 43(4) 47(3) -1(3) 20(3) 4(3)

C(4) 95(7) 52(5) 85(6) -3(5) 58(6) 0(4)

C(5) 91(7) 45(4) 94(7) -14(5) 37(6) -1(4)

_______________________________________________________________________

**Table 10. Hydrogen coordinates ( x 10^4) and isotropic**

**displacement parameters (A^2 x 10^3) for 2.**

________________________________________________________________

x y z U(eq)

________________________________________________________________

H(2A) 91(4) 1983(4) 3874(3) 47

H(4A) 1929(8) 384(7) 2000(7) 93

H(4B) 2059(8) 1304(7) 1457(7) 93

H(4C) 2820(8) 1077(7) 2129(7) 93

H(5A) 295(8) 3705(6) 4134(7) 92

H(5B) 1362(8) 4062(6) 3986(7) 92

H(5C) 553(8) 4274(6) 3350(7) 92

________________________________________________________________

**Table 11. Crystal data and structure refinement for 3.**

Identification code c998

Empirical formula C46 H66 Cl6 Co2 N18 O6 S3

Formula weight 1393.91

Temperature 223(2) K

Wavelength 0.71073 A

Crystal system Orthorhombic

Space group P2(1)2(1)2(1)

Unit cell dimensions a = 13.699(2) A alpha = 90 deg.

b = 21.594(3) A beta = 90 deg.

c = 22.220(3) A gamma = 90 deg.

Volume 6573(2) A^3

Z 4

Density (calculated) 1.409 Mg/m^3

Absorption coefficient 0.901 mm^-1

F(000) 2880

Crystal size 0.47 x 0.30 x 0.25 mm

Theta range for data collection 1.31 to 27.01 deg.

Index ranges -14<=h<=17, -27<=k<=27, -28<=l<=27

Reflections collected 41390

Independent reflections 14262 [R(int) = 0.0430]

Refinement method Full-matrix least-squares on F^2

Data / restraints / parameters 11753 / 0 / 730

Goodness-of-fit on F^2 1.025

Final R indices [I>2sigma(I)] R1 = 0.0550, wR2 = 0.1373

R indices (all data) R1 = 0.0975, wR2 = 0.2292

Absolute structure parameter 0.41(2)

Largest diff. peak and hole 0.674 and -0.326 e.A^-3

**Table 12. Atomic coordinates ( x 10^4) and equivalent isotropic**

**displacement parameters (A^2 x 10^3) for 3. U(eq) is defined**

**as one third of the trace of the orthogonalized Uij tensor.**

________________________________________________________________

x y z U(eq)

________________________________________________________________

Co(1) 7743(1) 8472(1) 1350(1) 25(1)

Co(2) 12681(1) 11541(1) 1319(1) 27(1)

S(1) 7126(1) 7646(1) 2618(1) 27(1)

S(2) 8669(2) 9561(1) -441(1) 81(1)

S(3) 12616(3) 10297(2) -467(1) 136(1)

O(1) 7499(2) 7057(1) 2859(1) 32(1)

O(2) 7644(2) 7764(1) 2041(1) 33(1)

O(3) 7322(3) 8152(1) 3039(1) 41(1)

O(4) 6075(2) 7581(2) 2499(1) 42(1)

N(1) 6518(3) 8012(2) 903(2) 30(1)

N(2) 5730(3) 7883(2) 1259(2) 36(1)

N(3) 3776(3) 7209(2) -960(2) 31(1)

N(4) 3370(3) 7774(2) -850(2) 34(1)

N(5) 8881(3) 8917(2) 1870(2) 31(1)

N(6) 9658(3) 8577(2) 2048(2) 35(1)

N(7) 11637(3) 10929(2) 1768(2) 31(1)

N(8) 11836(3) 10796(2) 2351(2) 33(1)

N(9) 11485(3) 12081(2) 959(2) 33(1)

N(10) 10693(3) 12152(2) 1313(2) 36(1)

N(11) 8441(3) 12224(2) -841(2) 36(1)

N(12) 8740(3) 12818(2) -918(2) 34(1)

N(13) 14577(3) 11396(2) 2011(2) 38(1)

N(14) 13857(3) 11061(2) 1774(2) 33(1)

N(15) 16694(3) 9077(2) 1765(2) 29(1)

N(16) 16722(3) 9174(2) 2369(2) 33(1)

N(17) 8015(3) 9049(2) 633(2) 37(1)

N(18) 12757(4) 10981(2) 582(2) 42(1)

C(1) 6200(4) 7946(2) 334(2) 35(1)

C(2) 5200(4) 7782(2) 332(2) 34(1)

C(3) 4932(4) 7745(2) 932(2) 37(1)

C(4) 3976(5) 7570(5) 1218(3) 72(2)

**Table 12. Atomic coordinates ( x 10^4) and equivalent isotropic**

**displacement parameters (A^2 x 10^3) for 3 (CONTINUE).**

C(5) 6845(4) 8039(3) -192(2) 49(1)

C(6) 3819(4) 8067(2) -394(2) 39(1)

C(7) 4554(3) 7677(2) -192(2) 32(1)

C(8) 4494(3) 7155(2) -561(2) 33(1)

C(9) 5154(4) 6600(3) -557(2) 44(1)

C(10) 3503(6) 8695(3) -175(3) 58(2)

C(11) 10454(4) 8929(2) 2148(2) 37(1)

C(12) 10189(3) 9527(2) 2036(2) 32(1)

C(13) 9197(4) 9503(2) 1869(2) 33(1)

C(14) 8537(4) 10037(2) 1728(2) 41(1)

C(15) 11399(4) 8646(3) 2330(4) 60(2)

C(16) 11356(4) 10295(2) 2543(2) 37(1)

C(17) 10808(4) 10081(2) 2056(2) 34(1)

C(18) 11025(4) 10497(2) 1584(2) 34(1)

C(19) 10623(5) 10486(3) 962(2) 50(1)

C(20) 11480(5) 10060(3) 3169(2) 55(2)

C(21) 11164(4) 12164(2) 402(2) 34(1)

C(22) 10154(4) 12285(2) 397(2) 37(1)

C(23) 9883(4) 12282(3) 991(2) 42(1)

C(24) 8926(5) 12371(4) 1291(3) 71(2)

C(25) 11813(4) 12144(3) -126(2) 51(1)

C(26) 8886(4) 11942(2) -372(2) 38(1)

C(27) 9521(4) 12382(3) -130(2) 38(1)

C(28) 9414(4) 12912(2) -493(2) 38(1)

C(29) 9965(5) 13501(3) -427(3) 56(1)

C(30) 8689(6) 11294(3) -197(3) 65(2)

C(31) 15369(4) 11051(3) 2143(2) 45(1)

C(32) 15130(4) 10444(2) 1979(2) 37(1)

C(33) 14169(4) 10477(2) 1753(2) 34(1)

C(34) 13564(4) 9954(2) 1524(3) 49(1)

C(35) 16262(5) 11310(4) 2416(5) 77(2)

C(36) 16171(4) 9654(2) 2542(2) 40(1)

C(37) 15764(3) 9898(2) 2024(2) 34(1)

C(38) 16104(3) 9516(2) 1550(2) 33(1)

C(39) 15877(4) 9574(3) 901(2) 46(1)

C(40) 16060(6) 9827(4) 3188(3) 64(2)

C(41) 12719(6) 10706(3) 151(3) 60(1)

C(42) 8291(4) 9261(2) 186(2) 42(1)

C(43) 6355(7) 10097(4) -1046(3) 79(2)

C(44) 4319(18) 8393(10) 3234(9) 157(6)

Cl(1) 6441(2) 10830(1) -1370(2) 112(1)

Cl(2) 6300(3) 9556(2) -1649(2) 123(1)

Cl(3) 5335(2) 10029(2) -586(1) 119(1)

Cl(4) 4061(6) 8919(2) 3684(3) 176(2)

Cl(5) 3788(5) 7707(2) 3263(2) 164(2)

Cl(6) 4255(3) 8669(2) 2434(2) 146(1)

O(5) 9543(3) 7249(2) 2336(2) 44(1)

C(45) 10056(5) 6795(4) 2014(4) 69(2)

O(6) 6955(3) 6449(2) 1604(2) 62(1)

C(46) 6173(8) 6113(6) 1336(6) 106(3)

________________________________________________________________

**Table 13. Bond lengths [A] and angles [deg] for 3.**

_____________________________________________________________

| Co(1)-N(17) 2.056(4)  Co(1)-N(15)#1 2.150(4)  Co(1)-N(5) 2.165(4)  Co(1)-O(2) 2.171(3)  Co(1)-N(1) 2.189(4)  Co(1)-N(3)#2 2.217(4)  Co(2)-N(18) 2.038(4)  Co(2)-O(1)#3 2.154(3)  Co(2)-N(9) 2.164(4)  Co(2)-N(14) 2.165(4)  Co(2)-N(7) 2.188(4)  Co(2)-N(12)#4 2.194(4)  S(1)-O(3) 1.463(3)  S(1)-O(4) 1.469(3)  S(1)-O(1) 1.472(3)  S(1)-O(2) 1.487(3)  S(2)-C(42) 1.621(5)  S(3)-C(41) 1.640(6)  O(1)-Co(2)#5 2.154(3)  N(1)-C(1) 1.344(6)  N(1)-N(2) 1.366(6)  N(2)-C(3) 1.345(6)  N(3)-C(8) 1.329(6)  N(3)-N(4) 1.362(6)  N(3)-Co(1)#6 2.217(4)  N(4)-C(6) 1.345(6)  N(5)-C(13) 1.337(6)  N(5)-N(6) 1.353(6)  N(6)-C(11) 1.347(7)  N(7)-C(18) 1.319(6)  N(7)-N(8) 1.353(5) | N(8)-C(16) 1.337(7)  N(9)-C(21) 1.326(6)  N(9)-N(10) 1.348(6)  N(10)-C(23) 1.349(7)  N(11)-C(26) 1.351(6)  N(11)-N(12) 1.358(6)  N(12)-C(28) 1.336(6)  N(12)-Co(2)#7 2.194(4)  N(13)-N(14) 1.332(6)  N(13)-C(31) 1.349(7)  N(14)-C(33) 1.332(6)  N(15)-C(38) 1.335(6)  N(15)-N(16) 1.359(5)  N(15)-Co(1)#8 2.150(4)  N(16)-C(36) 1.338(6)  N(17)-C(42) 1.158(6)  N(18)-C(41) 1.126(7)  C(1)-C(2) 1.415(7)  C(1)-C(5) 1.479(7)  C(2)-C(3) 1.386(7)  C(2)-C(7) 1.480(6)  C(3)-C(4) 1.503(8)  C(6)-C(7) 1.387(7)  C(6)-C(10) 1.503(8)  C(7)-C(8) 1.397(7)  C(8)-C(9) 1.502(7)  C(11)-C(12) 1.364(7)  C(11)-C(15) 1.487(8)  C(12)-C(13) 1.410(7)  C(12)-C(17) 1.467(7)  C(13)-C(14) 1.498(7) | C(16)-C(17) 1.395(7)  C(16)-C(20) 1.490(7)  C(17)-C(18) 1.413(7)  C(18)-C(19) 1.490(7)  C(21)-C(22) 1.409(8)  C(21)-C(25) 1.473(8)  C(22)-C(23) 1.371(8)  C(22)-C(27) 1.473(7)  C(23)-C(24) 1.482(9)  C(26)-C(27) 1.397(8)  C(26)-C(30) 1.478(9)  C(27)-C(28) 1.407(8)  C(28)-C(29) 1.485(8)  C(31)-C(32) 1.401(8)  C(31)-C(35) 1.474(9)  C(32)-C(33) 1.410(7)  C(32)-C(37) 1.466(7)  C(33)-C(34) 1.491(8)  C(36)-C(37) 1.385(7)  C(36)-C(40) 1.490(7)  C(37)-C(38) 1.418(7)  C(38)-C(39) 1.479(7)  C(43)-Cl(3) 1.736(10)  C(43)-Cl(1) 1.743(9)  C(43)-Cl(2) 1.780(9)  C(44)-Cl(4) 1.55(2)  C(44)-Cl(5) 1.65(3)  C(44)-Cl(6) 1.88(2)  O(5)-C(45) 1.403(8)  O(6)-C(46) 1.424(12) |
| --- | --- | --- |

| N(17)-Co(1)-N(15)#1 94.9(2)  N(17)-Co(1)-N(5) 90.8(2)  N(15)#1-Co(1)-N(5) 88.96(14)  N(17)-Co(1)-O(2) 170.35(14)  N(15)#1-Co(1)-O(2) 94.77(13)  N(5)-Co(1)-O(2) 88.86(13)  N(17)-Co(1)-N(1) 93.6(2)  N(15)#1-Co(1)-N(1) 87.61(14)  N(5)-Co(1)-N(1) 174.63(14)  O(2)-Co(1)-N(1) 87.32(13)  N(17)-Co(1)-N(3)#2 89.1(2)  N(15)#1-Co(1)-N(3)#2 175.8(2)  N(5)-Co(1)-N(3)#2 92.5(2)  O(2)-Co(1)-N(3)#2 81.30(13)  N(1)-Co(1)-N(3)#2 90.62(14)  N(18)-Co(2)-O(1)#3 173.8(2)  N(18)-Co(2)-N(9) 93.5(2)  O(1)#3-Co(2)-N(9) 86.96(13)  N(18)-Co(2)-N(14) 93.1(2)  O(1)#3-Co(2)-N(14) 86.41(13)  N(9)-Co(2)-N(14) 173.4(2)  N(18)-Co(2)-N(7) 92.4(2)  O(1)#3-Co(2)-N(7) 81.41(13)  N(9)-Co(2)-N(7) 89.9(2)  N(14)-Co(2)-N(7) 89.1(2)  N(18)-Co(2)-N(12)#4 90.8(2)  O(1)#3-Co(2)-N(12)#4 95.36(13)  N(9)-Co(2)-N(12)#4 90.6(2)  N(14)-Co(2)-N(12)#4 90.0(2)  N(7)-Co(2)-N(12)#4 176.7(2)  O(3)-S(1)-O(4) 111.5(2)  O(3)-S(1)-O(1) 110.3(2) | O(4)-S(1)-O(1) 108.8(2)  O(3)-S(1)-O(2) 109.6(2)  O(4)-S(1)-O(2) 109.3(2)  O(1)-S(1)-O(2) 107.2(2)  S(1)-O(1)-Co(2)#5 135.8(2)  S(1)-O(2)-Co(1) 139.4(2)  C(1)-N(1)-N(2) 105.4(4)  C(1)-N(1)-Co(1) 136.3(3)  N(2)-N(1)-Co(1) 115.8(3)  C(3)-N(2)-N(1) 112.1(4)  C(8)-N(3)-N(4) 105.1(3)  C(8)-N(3)-Co(1)#6 132.3(3)  N(4)-N(3)-Co(1)#6 113.8(3)  C(6)-N(4)-N(3) 111.8(4)  C(13)-N(5)-N(6) 105.0(4)  C(13)-N(5)-Co(1) 130.7(3)  N(6)-N(5)-Co(1) 118.8(3)  C(11)-N(6)-N(5) 112.3(4)  C(18)-N(7)-N(8) 105.9(4)  C(18)-N(7)-Co(2) 134.5(3)  N(8)-N(7)-Co(2) 115.7(3)  C(16)-N(8)-N(7) 112.2(4)  C(21)-N(9)-N(10) 105.2(4)  C(21)-N(9)-Co(2) 132.0(3)  N(10)-N(9)-Co(2) 117.1(3)  N(9)-N(10)-C(23) 112.2(4)  C(26)-N(11)-N(12) 112.7(4)  C(28)-N(12)-N(11) 105.3(4)  C(28)-N(12)-Co(2)#7 130.4(3)  N(11)-N(12)-Co(2)#7 116.6(3)  N(14)-N(13)-C(31) 112.4(4)  C(33)-N(14)-N(13) 106.9(4) |
| --- | --- |

**Table 13. Bond lengths [A] and angles [deg] for 3 (CONTINUE).**

| C(33)-N(14)-Co(2) 132.5(3)  N(13)-N(14)-Co(2) 118.4(3)  C(38)-N(15)-N(16) 105.2(3)  C(38)-N(15)-Co(1)#8 133.1(3)  N(16)-N(15)-Co(1)#8 119.9(3)  C(36)-N(16)-N(15) 112.8(4)  C(42)-N(17)-Co(1) 164.5(4)  C(41)-N(18)-Co(2) 172.8(5)  N(1)-C(1)-C(2) 110.1(4)  N(1)-C(1)-C(5) 122.3(4)  C(2)-C(1)-C(5) 127.6(4)  C(3)-C(2)-C(1) 105.5(4)  C(3)-C(2)-C(7) 126.2(4)  C(1)-C(2)-C(7) 128.3(4)  N(2)-C(3)-C(2) 106.9(4)  N(2)-C(3)-C(4) 122.4(4)  C(2)-C(3)-C(4) 130.6(5)  N(4)-C(6)-C(7) 106.8(4)  N(4)-C(6)-C(10) 122.5(5)  C(7)-C(6)-C(10) 130.7(5)  C(6)-C(7)-C(8) 105.0(4)  C(6)-C(7)-C(2) 126.5(4)  C(8)-C(7)-C(2) 128.4(4)  N(3)-C(8)-C(7) 111.3(4)  N(3)-C(8)-C(9) 121.3(4)  C(7)-C(8)-C(9) 127.3(4)  N(6)-C(11)-C(12) 106.8(4)  N(6)-C(11)-C(15) 121.1(4)  C(12)-C(11)-C(15) 132.1(5)  C(11)-C(12)-C(13) 105.6(4)  C(11)-C(12)-C(17) 127.8(4)  C(13)-C(12)-C(17) 126.5(4)  N(5)-C(13)-C(12) 110.3(4)  N(5)-C(13)-C(14) 122.2(4)  C(12)-C(13)-C(14) 127.5(4)  N(8)-C(16)-C(17) 106.6(4)  N(8)-C(16)-C(20) 121.2(4)  C(17)-C(16)-C(20) 132.2(5)  C(16)-C(17)-C(18) 104.6(4)  C(16)-C(17)-C(12) 127.2(4)  C(18)-C(17)-C(12) 128.1(4)  N(7)-C(18)-C(17) 110.7(4)  N(7)-C(18)-C(19) 122.3(4)  C(17)-C(18)-C(19) 127.0(5) | N(9)-C(21)-C(22) 110.9(4)  N(9)-C(21)-C(25) 122.7(5)  C(22)-C(21)-C(25) 126.4(4)  C(23)-C(22)-C(21) 105.0(4)  C(23)-C(22)-C(27) 127.4(5)  C(21)-C(22)-C(27) 127.6(4)  N(10)-C(23)-C(22) 106.7(5)  N(10)-C(23)-C(24) 121.1(5)  C(22)-C(23)-C(24) 132.1(5)  N(11)-C(26)-C(27) 105.7(4)  N(11)-C(26)-C(30) 123.2(5)  C(27)-C(26)-C(30) 131.1(5)  C(26)-C(27)-C(28) 105.6(4)  C(26)-C(27)-C(22) 125.1(5)  C(28)-C(27)-C(22) 129.3(5)  N(12)-C(28)-C(27) 110.6(4)  N(12)-C(28)-C(29) 123.4(5)  C(27)-C(28)-C(29) 125.9(4)  N(13)-C(31)-C(32) 105.8(5)  N(13)-C(31)-C(35) 123.2(5)  C(32)-C(31)-C(35) 131.0(5)  C(31)-C(32)-C(33) 105.3(4)  C(31)-C(32)-C(37) 126.6(5)  C(33)-C(32)-C(37) 128.1(5)  N(14)-C(33)-C(32) 109.6(4)  N(14)-C(33)-C(34) 123.3(4)  C(32)-C(33)-C(34) 127.1(4)  N(16)-C(36)-C(37) 106.4(4)  N(16)-C(36)-C(40) 121.9(5)  C(37)-C(36)-C(40) 131.6(5)  C(36)-C(37)-C(38) 105.3(4)  C(36)-C(37)-C(32) 127.0(4)  C(38)-C(37)-C(32) 127.7(4)  N(15)-C(38)-C(37) 110.2(4)  N(15)-C(38)-C(39) 122.5(4)  C(37)-C(38)-C(39) 127.3(4)  N(18)-C(41)-S(3) 177.5(7)  N(17)-C(42)-S(2) 179.5(5)  Cl(3)-C(43)-Cl(1) 112.0(6)  Cl(3)-C(43)-Cl(2) 110.7(5)  Cl(1)-C(43)-Cl(2) 106.7(4)  Cl(4)-C(44)-Cl(5) 122(2)  Cl(4)-C(44)-Cl(6) 111.6(12)  Cl(5)-C(44)-Cl(6) 107.5(9) |
| --- | --- |

_____________________________________________________________

Symmetry transformations used to generate equivalent atoms:

#1 x-1,y,z #2 x+1/2,-y+3/2,-z #3 -x+2,y+1/2,-z+1/2

#4 x+1/2,-y+5/2,-z #5 -x+2,y-1/2,-z+1/2

#6 x-1/2,-y+3/2,-z #7 x-1/2,-y+5/2,-z

#8 x+1,y,z

**Table 14. Anisotropic displacement parameters (A^2 x 10^3) for 3.**

**The anisotropic displacement factor exponent takes the form:**

**-2 pi^2 [ h^2 a*^2 U11 + ... + 2 h k a* b* U12 ]**

_______________________________________________________________________

U11 U22 U33 U23 U13 U12

_______________________________________________________________________

Co(1) 27(1) 26(1) 23(1) -1(1) 1(1) 0(1)

Co(2) 28(1) 27(1) 25(1) 1(1) 1(1) 1(1)

S(1) 33(1) 26(1) 23(1) 1(1) 1(1) -1(1)

S(2) 85(1) 102(1) 56(1) 43(1) 15(1) 2(1)

S(3) 204(3) 128(2) 76(1) -65(1) -14(2) 42(2)

O(1) 38(2) 27(1) 32(1) 6(1) 0(1) 2(1)

O(2) 38(2) 34(2) 26(1) 6(1) 6(1) 1(1)

O(3) 67(2) 31(2) 26(1) 0(1) -2(2) -6(2)

O(4) 32(2) 52(2) 41(2) 14(1) -2(1) -1(1)

N(1) 30(2) 33(2) 28(2) -4(1) -3(2) -1(2)

N(2) 34(2) 47(2) 27(2) -1(2) -3(2) -8(2)

N(3) 33(2) 28(2) 31(2) -2(1) -6(2) -6(2)

N(4) 27(2) 37(2) 36(2) -3(2) -8(2) -1(2)

N(5) 31(2) 28(2) 33(2) -2(1) 2(2) 1(2)

N(6) 36(2) 25(2) 43(2) 8(2) -4(2) -2(2)

N(7) 34(2) 35(2) 23(2) 3(1) -3(2) -7(2)

N(8) 39(2) 34(2) 26(2) -2(2) -3(2) -8(2)

N(9) 33(2) 41(2) 26(2) 3(2) -5(2) 4(2)

N(10) 32(2) 47(2) 29(2) 2(2) -4(2) 5(2)

N(11) 44(2) 32(2) 32(2) 1(2) -10(2) 1(2)

N(12) 33(2) 37(2) 34(2) 3(2) -4(2) -1(2)

N(13) 32(2) 36(2) 44(2) -6(2) -2(2) 9(2)

N(14) 31(2) 31(2) 37(2) -1(2) -4(2) 6(2)

N(15) 30(2) 35(2) 22(2) -6(1) -4(2) 3(2)

N(16) 40(2) 33(2) 25(2) -4(1) 0(2) 7(2)

N(17) 41(2) 37(2) 32(2) 7(2) -1(2) 4(2)

N(18) 49(2) 43(2) 35(2) -4(2) 4(2) 3(2)

C(1) 38(2) 38(2) 28(2) -7(2) -7(2) -1(2)

C(2) 32(2) 39(2) 31(2) -1(2) -6(2) -3(2)

C(3) 32(2) 46(3) 34(2) -2(2) -3(2) -12(2)

C(4) 42(3) 124(6) 51(3) 0(4) 1(3) -30(4)

C(5) 40(3) 80(4) 27(2) -11(2) 0(2) -6(2)

C(6) 46(3) 37(3) 32(2) 0(2) -4(2) -3(2)

C(7) 35(2) 35(2) 26(2) -1(2) -5(2) -3(2)

C(8) 34(2) 35(2) 30(2) -3(2) -5(2) 1(2)

C(9) 42(3) 44(3) 46(2) -8(2) -14(2) 5(2)

C(10) 71(4) 43(3) 61(3) -18(2) -25(3) 10(3)

C(11) 39(3) 31(2) 43(2) 6(2) -4(2) -7(2)

C(12) 32(2) 36(2) 26(2) 5(2) 0(2) -5(2)

C(13) 37(2) 26(2) 36(2) 2(2) -2(2) -2(2)

C(14) 41(3) 29(2) 52(3) -1(2) -2(2) -3(2)

C(15) 40(3) 51(3) 88(4) 11(3) -17(3) -5(2)

C(16) 39(2) 40(2) 33(2) 1(2) -4(2) -5(2)

C(17) 37(2) 29(2) 37(2) 3(2) -3(2) -3(2)

C(18) 36(2) 33(2) 34(2) 1(2) -2(2) -4(2)

C(19) 50(3) 64(3) 36(2) 3(2) -7(2) -19(3)

C(20) 75(4) 61(3) 30(2) 12(2) -10(2) -25(3)

C(21) 37(2) 35(2) 31(2) 4(2) -6(2) 1(2)

C(22) 34(2) 42(3) 37(2) 6(2) -7(2) 7(2)

C(23) 40(3) 52(3) 34(2) 2(2) -6(2) 5(2)

C(24) 40(3) 120(6) 53(3) -8(4) 4(3) 26(3)

C(25) 45(3) 76(4) 32(2) 13(2) 2(2) 10(3)

C(26) 41(3) 37(2) 37(2) 5(2) -15(2) 3(2)

C(27) 36(2) 47(3) 31(2) 1(2) -4(2) -1(2)

C(28) 36(2) 41(3) 36(2) -2(2) -11(2) 3(2)

C(29) 59(3) 55(3) 54(3) 8(3) -22(3) -16(3)

C(30) 81(4) 54(3) 61(4) 16(3) -25(3) -7(3)

C(31) 40(3) 49(3) 47(3) -11(2) -11(2) 12(2)

C(32) 39(2) 31(2) 40(2) -8(2) -3(2) 8(2)

C(33) 35(2) 30(2) 35(2) 0(2) -4(2) 7(2)

C(34) 41(3) 31(2) 74(4) -2(2) -7(2) 1(2)

C(35) 50(3) 61(4) 121(6) -37(4) -38(4) 18(3)

C(36) 46(3) 39(2) 34(2) -6(2) -2(2) 15(2)

C(37) 36(2) 34(2) 31(2) -7(2) -2(2) 8(2)

C(38) 32(2) 31(2) 35(2) -4(2) -4(2) 4(2)

C(39) 50(3) 56(3) 32(2) -2(2) -8(2) 16(2)

C(40) 77(4) 80(4) 34(3) -16(3) -2(3) 33(4)

C(41) 81(4) 52(3) 46(3) -9(3) 4(3) 14(3)

C(42) 47(3) 40(2) 38(2) 4(2) 2(2) 3(2)

C(43) 85(5) 95(5) 57(4) 8(3) -22(3) -22(4)

C(44) 180(15) 146(13) 144(12) -28(10) -57(11) 39(12)

Cl(1) 113(2) 95(2) 127(2) 29(2) -3(2) -16(1)

Cl(2) 125(2) 131(2) 112(2) -37(2) -5(2) -27(2)

**Table 14. Anisotropic displacement parameters (A^2 x 10^3) for 3 (CONTINUE).**

Cl(3) 126(2) 171(3) 61(1) 12(1) 9(1) -44(2)

Cl(4) 251(6) 118(2) 159(3) -19(2) 63(4) -10(3)

Cl(5) 233(5) 123(3) 135(3) 1(2) 50(3) -28(3)

Cl(6) 140(3) 166(3) 133(3) 45(2) 11(2) 4(2)

O(5) 47(2) 45(2) 41(2) 1(2) 1(1) 0(2)

C(45) 64(4) 61(4) 83(4) -16(3) 0(3) 15(3)

O(6) 65(2) 60(2) 61(2) -6(2) 5(2) -6(2)

C(46) 87(6) 112(7) 119(7) -23(6) -1(6) -21(5)

_______________________________________________________________________

**Table 15. Hydrogen coordinates ( x 10^4) and isotropic**

**displacement parameters (A^2 x 10^3) for 3.**

________________________________________________________________

x y z U(eq)

________________________________________________________________

H(2A) 5743(3) 7890(2) 1645(2) 43

H(4D) 2885(3) 7924(2) -1048(2) 40

H(6A) 9646(3) 8182(2) 2093(2) 42

H(8A) 12225(3) 11010(2) 2572(2) 40

H(10D) 10703(3) 12118(2) 1698(2) 43

H(11A) 8014(3) 12046(2) -1066(2) 43

H(13A) 14540(3) 11789(2) 2073(2) 45

H(16A) 17058(3) 8951(2) 2614(2) 39

H(4A) 4037(5) 7591(5) 1648(3) 87

H(4B) 3805(5) 7156(5) 1102(3) 87

H(4C) 3477(5) 7852(5) 1087(3) 87

H(5A) 7488(4) 8148(3) -56(2) 59

H(5B) 6589(4) 8365(3) -439(2) 59

H(5C) 6876(4) 7663(3) -422(2) 59

H(9A) 4943(4) 6311(3) -858(2) 53

H(9B) 5132(4) 6406(3) -169(2) 53

H(9C) 5811(4) 6728(3) -642(2) 53

H(10A) 2967(6) 8839(3) -415(3) 70

H(10B) 4038(6) 8980(3) -208(3) 70

H(10C) 3303(6) 8666(3) 238(3) 70

H(14A) 7899(4) 9884(2) 1628(2) 49

H(14B) 8796(4) 10265(2) 1394(2) 49

H(14C) 8493(4) 10303(2) 2073(2) 49

H(15A) 11319(4) 8206(3) 2369(4) 71

H(15B) 11603(4) 8817(3) 2708(4) 71

H(15C) 11883(4) 8732(3) 2029(4) 71

H(19A) 10895(5) 10823(3) 734(2) 60

H(19B) 9926(5) 10529(3) 977(2) 60

H(19C) 10789(5) 10101(3) 772(2) 60

H(20A) 11920(5) 10326(3) 3384(2) 66

H(20B) 11742(5) 9648(3) 3158(2) 66

H(20C) 10858(5) 10055(3) 3368(2) 66

H(24A) 9007(5) 12339(4) 1719(3) 85

H(24B) 8478(5) 12059(4) 1155(3) 85

H(24C) 8675(5) 12774(4) 1192(3) 85

H(25A) 12467(4) 12053(3) 1(2) 61

H(25B) 11802(4) 12538(3) -326(2) 61

H(25C) 11593(4) 11828(3) -398(2) 61

H(29A) 9755(5) 13789(3) -730(3) 67

H(29B) 10650(5) 13421(3) -474(3) 67

H(29C) 9845(5) 13673(3) -35(3) 67

H(30A) 8206(6) 11121(3) -461(3) 78

H(30B) 8453(6) 11282(3) 209(3) 78

H(30C) 9280(6) 11056(3) -226(3) 78

H(34A) 12939(4) 10108(2) 1398(3) 58

H(34B) 13476(4) 9654(2) 1837(3) 58

H(34C) 13887(4) 9764(2) 1188(3) 58

H(35A) 16185(5) 11748(4) 2471(5) 93

H(35B) 16808(5) 11232(4) 2156(5) 93

H(35C) 16374(5) 11117(4) 2799(5) 93

H(39A) 16207(4) 9253(3) 683(2) 55

H(39B) 16092(4) 9971(3) 759(2) 55

H(39C) 15185(4) 9536(3) 842(2) 55

H(40A) 16452(6) 9557(4) 3431(3) 77

H(40B) 15388(6) 9788(4) 3303(3) 77

H(40C) 16269(6) 10247(4) 3245(3) 77

H(43A) 6943(7) 10017(4) -807(3) 95

H(44A) 5013(18) 8309(10) 3304(9) 188

H(45A) 10646(5) 6693(4) 2224(4) 83

H(45B) 10213(5) 6950(4) 1621(4) 83

H(45C) 9658(5) 6431(4) 1976(4) 83

H(46A) 6421(8) 5736(6) 1164(6) 127

H(46B) 5877(8) 6359(6) 1027(6) 127

H(46C) 5695(8) 6015(6) 1638(6) 127

**Table 16. Crystal data and structure refinement for 4.**

Identification code c1066

Empirical formula C46 H66 Cl6 N18 Ni2 O6 S3

Formula weight 1393.47

Temperature 223(2) K

Wavelength 0.71073 A

Crystal system Orthorhombic

Space group P2(1)2(1)2(1)

Unit cell dimensions a = 13.6250(14) A alpha = 90 deg.

b = 21.376(2) A beta = 90 deg.

c = 22.072(2) A gamma = 90 deg.

Volume 6428.5(12) A^3

Z 4

Density (calculated) 1.440 Mg/m^3

Absorption coefficient 0.991 mm^-1

F(000) 2888

Crystal size 0.45 x 0.32 x 0.20 mm

Theta range for data collection 1.33 to 28.28 deg.

Index ranges -18<=h<=18, -28<=k<=28, -29<=l<=28

Reflections collected 59185

Independent reflections 15614 [R(int) = 0.0363]

Refinement method Full-matrix least-squares on F^2

Data / restraints / parameters 14258 / 0 / 758

Goodness-of-fit on F^2 1.032

Final R indices [I>2sigma(I)] R1 = 0.0496, wR2 = 0.1149

R indices (all data) R1 = 0.0695, wR2 = 0.1762

Absolute structure parameter 0.490(13)

Largest diff. peak and hole 0.628 and -0.385 e.A^-3

**Table 17. Atomic coordinates ( x 10^4) and equivalent isotropic**

**displacement parameters (A^2 x 10^3) for 4. U(eq) is defined**

**as one third of the trace of the orthogonalized Uij tensor.**

________________________________________________________________

x y z U(eq)

________________________________________________________________

Ni(1) 7742(1) 8467(1) 1342(1) 16(1)

Ni(2) 12688(1) 11538(1) 1312(1) 18(1)

S(1) 7130(1) 7651(1) 2623(1) 18(1)

S(2) 8662(1) 9545(1) -458(1) 69(1)

S(3) 12620(3) 10325(1) -498(1) 138(1)

O(1) 7491(2) 7051(1) 2863(1) 23(1)

O(2) 7630(2) 7759(1) 2036(1) 23(1)

O(3) 7364(2) 8158(1) 3044(1) 32(1)

O(4) 6071(2) 7605(1) 2515(1) 30(1)

N(1) 6530(2) 8020(1) 905(1) 21(1)

N(2) 5739(2) 7903(2) 1261(1) 24(1)

N(3) 3740(2) 7203(1) -955(1) 22(1)

N(4) 3344(2) 7778(1) -842(1) 24(1)

N(5) 8876(2) 8907(1) 1840(1) 21(1)

N(6) 9651(2) 8559(1) 2027(1) 24(1)

N(7) 11681(2) 10927(1) 1742(1) 22(1)

N(8) 11869(2) 10787(1) 2332(1) 24(1)

N(9) 11498(2) 12055(2) 955(1) 23(1)

N(10) 10709(2) 12132(2) 1314(2) 29(1)

N(11) 8419(2) 12229(2) -836(1) 28(1)

N(12) 8717(2) 12820(2) -913(1) 25(1)

N(13) 14569(2) 11406(2) 1988(1) 27(1)

N(14) 13846(2) 11065(2) 1743(1) 25(1)

N(15) 16728(2) 9075(1) 1745(1) 21(1)

**Table 17. Atomic coordinates ( x 10^4) and equivalent isotropic**

**displacement parameters (A^2 x 10^3) for 4 (CONTINUE).**

N(16) 16760(2) 9172(1) 2353(1) 23(1)

N(17) 8010(2) 9034(1) 627(1) 26(1)

N(18) 12763(3) 10987(2) 574(1) 31(1)

C(1) 6202(3) 7952(2) 336(2) 24(1)

C(2) 5200(3) 7793(2) 333(2) 24(1)

C(3) 4924(3) 7764(2) 937(2) 29(1)

C(4) 3979(3) 7606(3) 1227(2) 54(1)

C(5) 6854(3) 8028(2) -204(2) 37(1)

C(6) 3799(3) 8076(2) -388(2) 28(1)

C(7) 4543(2) 7686(2) -189(2) 23(1)

C(8) 4480(2) 7152(2) -557(2) 22(1)

C(9) 5147(3) 6595(2) -548(2) 34(1)

C(10) 3470(4) 8704(2) -169(2) 46(1)

C(11) 10451(3) 8909(2) 2128(2) 28(1)

C(12) 10197(3) 9518(2) 2013(2) 23(1)

C(13) 9200(3) 9497(2) 1838(2) 24(1)

C(14) 8545(3) 10040(2) 1691(2) 31(1)

C(15) 11400(3) 8617(2) 2312(3) 53(1)

C(16) 11382(3) 10284(2) 2527(2) 27(1)

C(17) 10831(3) 10072(2) 2034(2) 24(1)

C(18) 11048(3) 10491(2) 1559(2) 24(1)

C(19) 10651(4) 10477(2) 928(2) 41(1)

C(20) 11484(4) 10046(2) 3151(2) 43(1)

C(21) 11178(3) 12150(2) 392(2) 25(1)

C(22) 10155(3) 12281(2) 398(2) 29(1)

C(23) 9895(3) 12266(2) 1001(2) 33(1)

C(24) 8932(4) 12375(4) 1297(2) 66(2)

C(25) 11819(3) 12130(3) -149(2) 44(1)

C(26) 8873(3) 11941(2) -370(2) 32(1)

C(27) 9509(3) 12376(2) -129(2) 29(1)

C(28) 9401(3) 12919(2) -484(2) 29(1)

C(29) 9960(4) 13509(3) -422(2) 48(1)

C(30) 8671(5) 11280(2) -206(3) 56(1)

C(31) 15367(3) 11056(2) 2123(2) 34(1)

C(32) 15139(3) 10445(2) 1956(2) 27(1)

C(33) 14173(3) 10476(2) 1727(2) 24(1)

C(34) 13575(3) 9944(2) 1494(2) 37(1)

C(35) 16274(4) 11333(3) 2386(3) 60(2)

C(36) 16192(3) 9656(2) 2521(2) 29(1)

C(37) 15780(3) 9898(2) 2004(2) 26(1)

C(38) 16122(3) 9516(2) 1529(2) 23(1)

C(39) 15891(3) 9579(2) 870(2) 35(1)

C(40) 16076(4) 9825(3) 3177(2) 55(1)

C(41) 12731(5) 10718(2) 136(2) 51(1)

C(42) 8284(3) 9248(2) 179(2) 31(1)

C(43) 6351(5) 10082(4) -1068(3) 72(2)

C(44) 4245(15) 8421(8) 3261(8) 153(5)

Cl(1) 6440(4) 10836(2) -1363(2) 69(2)

Cl(2) 6360(10) 9513(5) -1647(6) 139(5)

Cl(3) 5305(6) 10031(3) -606(2) 84(2)

Cl(1A) 6160(17) 10863(10) -1217(15) 209(8)

Cl(2A) 6305(7) 9645(7) -1718(4) 104(4)

Cl(3A) 5421(12) 9730(19) -649(7) 193(10)

Cl(4) 4088(6) 8942(2) 3709(3) 206(3)

Cl(5) 3760(5) 7731(2) 3260(2) 189(2)

Cl(6) 4274(4) 8725(3) 2450(2) 171(2)

O(5) 9530(2) 7230(1) 2329(1) 35(1)

C(45) 10043(4) 6763(3) 2003(3) 62(1)

O(6) 6937(3) 6448(2) 1602(2) 54(1)

C(46) 6138(6) 6105(4) 1347(5) 89(2)

________________________________________________________________

**Table 18. Bond lengths [A] and angles [deg] for 4.**

**_____________________________________________________________**

| Ni(1)-N(17) 2.023(3)  Ni(1)-N(15)#1 2.095(3)  Ni(1)-N(5) 2.117(3)  Ni(1)-N(1) 2.138(3)  Ni(1)-N(3)#2 2.151(3)  Ni(1)-O(2) 2.159(2)  Ni(2)-N(18) 2.014(3)  Ni(2)-N(14) 2.101(3)  Ni(2)-N(9) 2.115(3)  Ni(2)-N(7) 2.119(3)  Ni(2)-O(1)#3 2.139(2)  Ni(2)-N(12)#4 2.151(3)  S(1)-O(3) 1.463(2)  S(1)-O(4) 1.465(2)  S(1)-O(1) 1.472(2)  S(1)-O(2) 1.483(2)  S(2)-C(42) 1.627(4)  S(3)-C(41) 1.639(5)  O(1)-Ni(2)#5 2.139(2)  N(1)-C(1) 1.341(4)  N(1)-N(2) 1.357(4)  N(2)-C(3) 1.353(4)  N(3)-C(8) 1.343(4)  N(3)-N(4) 1.364(4)  N(3)-Ni(1)#6 2.151(3)  N(4)-C(6) 1.339(5)  N(5)-C(13) 1.337(5)  N(5)-N(6) 1.357(4)  N(6)-C(11) 1.341(5)  N(7)-C(18) 1.333(5)  N(7)-N(8) 1.359(4)  N(8)-C(16) 1.336(5)  N(9)-C(21) 1.333(4) | N(9)-N(10) 1.345(4)  N(10)-C(23) 1.337(5)  N(11)-N(12) 1.339(5)  N(11)-C(26) 1.347(5)  N(12)-C(28) 1.345(5)  N(12)-Ni(2)#7 2.151(3)  N(13)-N(14) 1.340(4)  N(13)-C(31) 1.352(5)  N(14)-C(33) 1.336(5)  N(15)-C(38) 1.342(5)  N(15)-N(16) 1.358(4)  N(15)-Ni(1)#8 2.095(3)  N(16)-C(36) 1.346(5)  N(17)-C(42) 1.151(5)  N(18)-C(41) 1.125(5)  C(1)-C(2) 1.407(5)  C(1)-C(5) 1.495(5)  C(2)-C(3) 1.388(5)  C(2)-C(7) 1.476(5)  C(3)-C(4) 1.478(6)  C(6)-C(7) 1.383(5)  C(6)-C(10) 1.497(6)  C(7)-C(8) 1.404(5)  C(8)-C(9) 1.497(5)  C(11)-C(12) 1.372(5)  C(11)-C(15) 1.493(6)  C(12)-C(13) 1.413(5)  C(12)-C(17) 1.467(5)  C(13)-C(14) 1.500(5)  C(16)-C(17) 1.398(5)  C(16)-C(20) 1.476(5)  C(17)-C(18) 1.409(5) | C(18)-C(19) 1.495(5)  C(21)-C(22) 1.422(5)  C(21)-C(25) 1.481(6)  C(22)-C(23) 1.378(6)  C(22)-C(27) 1.472(5)  C(23)-C(24) 1.484(6)  C(26)-C(27) 1.377(6)  C(26)-C(30) 1.486(6)  C(27)-C(28) 1.409(6)  C(28)-C(29) 1.479(6)  C(31)-C(32) 1.393(6)  C(31)-C(35) 1.488(6)  C(32)-C(33) 1.410(5)  C(32)-C(37) 1.464(5)  C(33)-C(34) 1.490(6)  C(36)-C(37) 1.372(5)  C(36)-C(40) 1.502(5)  C(37)-C(38) 1.408(5)  C(38)-C(39) 1.492(5)  C(43)-Cl(2A) 1.712(11)  C(43)-Cl(1A) 1.72(2)  C(43)-Cl(3A) 1.740(14)  C(43)-Cl(1) 1.743(8)  C(43)-Cl(3) 1.756(10)  C(43)-Cl(2) 1.764(13)  C(44)-Cl(4) 1.50(2)  C(44)-Cl(5) 1.62(2)  C(44)-Cl(6) 1.90(2)  Cl(1)-Cl(1A) 0.50(3)  Cl(3)-Cl(3A) 0.67(4)  O(5)-C(45) 1.415(6)  O(6)-C(46) 1.428(8) |
| --- | --- | --- |

| N(17)-Ni(1)-N(15)#1 94.49(12)  N(17)-Ni(1)-N(5) 90.42(12)  N(15)#1-Ni(1)-N(5) 89.11(11)  N(17)-Ni(1)-N(1) 93.18(12)  N(15)#1-Ni(1)-N(1) 87.69(11)  N(5)-Ni(1)-N(1) 175.36(11)  N(17)-Ni(1)-N(3)#2 88.61(11)  N(15)#1-Ni(1)-N(3)#2 176.58(12)  N(5)-Ni(1)-N(3)#2 92.32(11)  N(1)-Ni(1)-N(3)#2 90.69(11)  N(17)-Ni(1)-O(2) 170.51(10)  N(15)#1-Ni(1)-O(2) 95.00(10)  N(5)-Ni(1)-O(2) 89.67(10)  N(1)-Ni(1)-O(2) 87.25(10)  N(3)#2-Ni(1)-O(2) 81.90(10)  N(18)-Ni(2)-N(14) 92.67(13)  N(18)-Ni(2)-N(9) 92.47(13)  N(14)-Ni(2)-N(9) 174.76(12)  N(18)-Ni(2)-N(7) 92.01(12)  N(14)-Ni(2)-N(7) 89.24(12)  N(9)-Ni(2)-N(7) 89.55(12)  N(18)-Ni(2)-O(1)#3 173.99(11)  N(14)-Ni(2)-O(1)#3 86.99(10)  N(9)-Ni(2)-O(1)#3 87.80(10)  N(7)-Ni(2)-O(1)#3 81.99(10)  N(18)-Ni(2)-N(12)#4 90.47(13) | N(14)-Ni(2)-N(12)#4 90.21(12)  N(9)-Ni(2)-N(12)#4 90.78(12)  N(7)-Ni(2)-N(12)#4 177.48(12)  O(1)#3-Ni(2)-N(12)#4 95.53(10)  O(3)-S(1)-O(4) 111.6(2)  O(3)-S(1)-O(1) 110.19(14)  O(4)-S(1)-O(1) 109.27(14)  O(3)-S(1)-O(2) 109.79(14)  O(4)-S(1)-O(2) 108.68(14)  O(1)-S(1)-O(2) 107.25(12)  S(1)-O(1)-Ni(2)#5 135.60(14)  S(1)-O(2)-Ni(1) 139.65(14)  C(1)-N(1)-N(2) 104.9(3)  C(1)-N(1)-Ni(1) 136.7(2)  N(2)-N(1)-Ni(1) 115.7(2)  C(3)-N(2)-N(1) 112.7(3)  C(8)-N(3)-N(4) 104.5(3)  C(8)-N(3)-Ni(1)#6 132.8(2)  N(4)-N(3)-Ni(1)#6 114.9(2)  C(6)-N(4)-N(3) 112.5(3)  C(13)-N(5)-N(6) 105.1(3)  C(13)-N(5)-Ni(1) 131.2(2)  N(6)-N(5)-Ni(1) 118.9(2)  C(11)-N(6)-N(5) 112.2(3)  C(18)-N(7)-N(8) 105.0(3)  C(18)-N(7)-Ni(2) 135.6(2) |
| --- | --- |

**Table 18. Bond lengths [A] and angles [deg] for 4 (CONTINUE).**

_____________________________________________________________

| N(8)-N(7)-Ni(2) 116.2(2)  C(16)-N(8)-N(7) 113.1(3)  C(21)-N(9)-N(10) 105.6(3)  C(21)-N(9)-Ni(2) 132.7(2)  N(10)-N(9)-Ni(2) 117.3(2)  C(23)-N(10)-N(9) 112.7(3)  N(12)-N(11)-C(26) 112.8(3)  N(11)-N(12)-C(28) 105.6(3)  N(11)-N(12)-Ni(2)#7 117.2(2)  C(28)-N(12)-Ni(2)#7 129.8(3)  N(14)-N(13)-C(31) 112.4(3)  C(33)-N(14)-N(13) 106.1(3)  C(33)-N(14)-Ni(2) 133.8(2)  N(13)-N(14)-Ni(2) 118.2(2)  C(38)-N(15)-N(16) 105.3(3)  C(38)-N(15)-Ni(1)#8 133.8(2)  N(16)-N(15)-Ni(1)#8 119.5(2)  C(36)-N(16)-N(15) 111.8(3)  C(42)-N(17)-Ni(1) 165.1(3)  C(41)-N(18)-Ni(2) 172.7(4)  N(1)-C(1)-C(2) 110.8(3)  N(1)-C(1)-C(5) 122.5(3)  C(2)-C(1)-C(5) 126.7(3)  C(3)-C(2)-C(1) 105.6(3)  C(3)-C(2)-C(7) 125.4(3)  C(1)-C(2)-C(7) 129.1(3)  N(2)-C(3)-C(2) 106.0(3)  N(2)-C(3)-C(4) 122.5(3)  C(2)-C(3)-C(4) 131.5(3)  N(4)-C(6)-C(7) 106.8(3)  N(4)-C(6)-C(10) 122.1(4)  C(7)-C(6)-C(10) 131.1(3)  C(6)-C(7)-C(8) 105.2(3)  C(6)-C(7)-C(2) 126.8(3)  C(8)-C(7)-C(2) 127.8(3)  N(3)-C(8)-C(7) 110.9(3)  N(3)-C(8)-C(9) 121.9(3)  C(7)-C(8)-C(9) 127.1(3)  N(6)-C(11)-C(12) 107.1(3)  N(6)-C(11)-C(15) 121.0(3)  C(12)-C(11)-C(15) 131.8(4)  C(11)-C(12)-C(13) 105.2(3)  C(11)-C(12)-C(17) 127.7(3)  C(13)-C(12)-C(17) 127.0(3)  N(5)-C(13)-C(12) 110.3(3)  N(5)-C(13)-C(14) 122.3(3)  C(12)-C(13)-C(14) 127.3(3)  N(8)-C(16)-C(17) 106.0(3)  N(8)-C(16)-C(20) 122.2(3)  C(17)-C(16)-C(20) 131.8(3)  C(16)-C(17)-C(18) 105.1(3)  C(16)-C(17)-C(12) 127.1(3)  C(18)-C(17)-C(12) 127.8(3)  N(7)-C(18)-C(17) 110.7(3)  N(7)-C(18)-C(19) 122.1(3)  C(17)-C(18)-C(19) 127.2(3)  N(9)-C(21)-C(22) 110.0(3)  N(9)-C(21)-C(25) 123.7(3) | C(22)-C(21)-C(25) 126.3(3)  C(23)-C(22)-C(21) 104.8(3)  C(23)-C(22)-C(27) 127.8(4)  C(21)-C(22)-C(27) 127.3(3)  N(10)-C(23)-C(22) 106.9(3)  N(10)-C(23)-C(24) 122.7(4)  C(22)-C(23)-C(24) 130.4(4)  N(11)-C(26)-C(27) 106.0(3)  N(11)-C(26)-C(30) 122.3(4)  C(27)-C(26)-C(30) 131.6(4)  C(26)-C(27)-C(28) 106.0(3)  C(26)-C(27)-C(22) 126.1(4)  C(28)-C(27)-C(22) 128.0(4)  N(12)-C(28)-C(27) 109.5(3)  N(12)-C(28)-C(29) 123.8(4)  C(27)-C(28)-C(29) 126.7(3)  N(13)-C(31)-C(32) 106.2(3)  N(13)-C(31)-C(35) 122.3(4)  C(32)-C(31)-C(35) 131.4(4)  C(31)-C(32)-C(33) 105.1(3)  C(31)-C(32)-C(37) 126.6(3)  C(33)-C(32)-C(37) 128.3(3)  N(14)-C(33)-C(32) 110.2(3)  N(14)-C(33)-C(34) 123.0(3)  C(32)-C(33)-C(34) 126.8(3)  N(16)-C(36)-C(37) 107.2(3)  N(16)-C(36)-C(40) 120.8(3)  C(37)-C(36)-C(40) 132.0(3)  C(36)-C(37)-C(38) 105.5(3)  C(36)-C(37)-C(32) 127.2(3)  C(38)-C(37)-C(32) 127.3(3)  N(15)-C(38)-C(37) 110.3(3)  N(15)-C(38)-C(39) 122.6(3)  C(37)-C(38)-C(39) 127.2(3)  N(18)-C(41)-S(3) 176.9(6)  N(17)-C(42)-S(2) 179.3(4)  Cl(2A)-C(43)-Cl(1A) 111.3(11)  Cl(2A)-C(43)-Cl(3A) 100.5(10)  Cl(1A)-C(43)-Cl(3A) 114.3(11)  Cl(2A)-C(43)-Cl(1) 101.2(6)  Cl(1A)-C(43)-Cl(1) 16.7(10)  Cl(3A)-C(43)-Cl(1) 130.5(13)  Cl(2A)-C(43)-Cl(3) 115.0(5)  Cl(1A)-C(43)-Cl(3) 92.8(11)  Cl(3A)-C(43)-Cl(3) 22.1(14)  Cl(1)-C(43)-Cl(3) 109.3(5)  Cl(2A)-C(43)-Cl(2) 10.8(8)  Cl(1A)-C(43)-Cl(2) 122.2(12)  Cl(3A)-C(43)-Cl(2) 95.3(12)  Cl(1)-C(43)-Cl(2) 111.6(6)  Cl(3)-C(43)-Cl(2) 112.5(5)  Cl(4)-C(44)-Cl(5) 128.1(14)  Cl(4)-C(44)-Cl(6) 111.6(10)  Cl(5)-C(44)-Cl(6) 108.5(8)  Cl(1A)-Cl(1)-C(43) 79(3)  Cl(3A)-Cl(3)-C(43) 78(2)  Cl(1)-Cl(1A)-C(43) 84(3)  Cl(3)-Cl(3A)-C(43) 80(2) |
| --- | --- |

_____________________________________________________________

Symmetry transformations used to generate equivalent atoms:

#1 x-1,y,z #2 x+1/2,-y+3/2,-z #3 -x+2,y+1/2,-z+1/2 #4 x+1/2,-y+5/2,-z

#5 -x+2,y-1/2,-z+1/2 #6 x-1/2,-y+3/2,-z #7 x-1/2,-y+5/2,-z #8 x+1,y,z

**Table 19. Anisotropic displacement parameters (A^2 x 10^3) for 4.**

**The anisotropic displacement factor exponent takes the form:**

**-2 pi^2 [ h^2 a*^2 U11 + ... + 2 h k a* b* U12 ]**

_______________________________________________________________________

U11 U22 U33 U23 U13 U12

_______________________________________________________________________

Ni(1) 17(1) 17(1) 14(1) -1(1) 0(1) 0(1)

Ni(2) 18(1) 19(1) 17(1) 1(1) 0(1) 1(1)

S(1) 21(1) 17(1) 15(1) 2(1) 0(1) 0(1)

S(2) 74(1) 89(1) 44(1) 40(1) 16(1) 3(1)

S(3) 228(3) 123(2) 64(1) -65(1) -21(2) 58(2)

O(1) 28(1) 21(1) 21(1) 3(1) 0(1) 5(1)

O(2) 25(1) 24(1) 21(1) 3(1) 7(1) 0(1)

O(3) 54(2) 20(1) 20(1) 0(1) -1(1) -3(1)

O(4) 20(1) 38(1) 32(1) 12(1) 0(1) -1(1)

N(1) 19(1) 25(1) 20(1) -3(1) -1(1) -4(1)

N(2) 21(1) 35(2) 16(1) -2(1) -2(1) -6(1)

N(3) 23(1) 24(2) 19(1) -1(1) -6(1) -2(1)

N(4) 22(1) 23(1) 26(1) -2(1) -7(1) 1(1)

N(5) 21(1) 19(1) 23(1) 0(1) -2(1) -2(1)

N(6) 25(1) 17(1) 32(1) 6(1) -5(1) -1(1)

N(7) 24(1) 23(1) 17(1) 1(1) -3(1) -4(1)

N(8) 26(1) 27(1) 18(1) 3(1) -2(1) -9(1)

N(9) 22(1) 29(2) 18(1) 6(1) 0(1) 1(1)

N(10) 23(1) 40(2) 23(1) 3(1) -3(1) 7(1)

N(11) 32(2) 26(2) 26(1) 2(1) -10(1) 0(1)

N(12) 23(1) 25(2) 27(1) 5(1) -3(1) -2(1)

N(13) 23(1) 24(2) 33(2) -7(1) -5(1) 6(1)

N(14) 21(1) 24(1) 28(1) -2(1) -2(1) 3(1)

N(15) 22(1) 22(1) 18(1) -5(1) -2(1) 4(1)

N(16) 30(1) 23(1) 18(1) -2(1) -4(1) 7(1)

N(17) 28(2) 29(1) 22(1) 2(1) 0(1) 2(1)

N(18) 34(2) 34(2) 25(1) -4(1) 1(1) 3(1)

C(1) 26(2) 29(2) 17(1) -6(1) -3(1) 0(1)

C(2) 25(2) 31(2) 18(1) -1(1) -5(1) -4(1)

C(3) 20(2) 40(2) 26(2) 0(2) -3(1) -10(2)

C(4) 30(2) 96(4) 35(2) 1(2) 1(2) -23(2)

C(5) 30(2) 65(3) 16(2) -8(2) 3(1) -9(2)

C(6) 31(2) 27(2) 27(2) 0(1) -5(2) -4(2)

C(7) 23(2) 27(2) 20(1) -5(1) -4(1) -7(1)

C(8) 22(2) 27(2) 19(1) -1(1) -4(1) -1(1)

C(9) 27(2) 36(2) 38(2) -5(2) -13(1) 5(2)

C(10) 52(3) 30(2) 57(3) -19(2) -19(2) 7(2)

C(11) 26(2) 25(2) 32(2) 6(1) -2(2) -4(1)

C(12) 23(2) 27(2) 20(1) 2(1) -1(1) -6(1)

C(13) 27(2) 20(2) 24(2) 2(1) -3(1) -2(1)

C(14) 33(2) 17(2) 42(2) -1(1) -4(2) -2(1)

C(15) 32(2) 38(2) 88(4) 15(2) -24(2) -5(2)

C(16) 28(2) 33(2) 21(2) 4(1) -3(1) -6(1)

C(17) 27(2) 24(2) 23(2) 1(1) -4(1) -4(1)

C(18) 26(2) 22(2) 23(2) -1(1) -2(1) -3(1)

C(19) 44(2) 52(3) 27(2) 9(2) -12(2) -22(2)

C(20) 56(3) 44(2) 29(2) 12(2) -5(2) -19(2)

C(21) 25(2) 30(2) 21(2) 3(1) -4(1) 3(1)

C(22) 27(2) 32(2) 27(2) 3(1) -6(1) 5(2)

C(23) 29(2) 43(2) 28(2) 0(2) -6(1) 7(2)

C(24) 33(2) 127(5) 38(2) -3(3) 1(2) 32(3)

C(25) 37(2) 70(3) 27(2) 9(2) -1(2) 7(2)

C(26) 38(2) 31(2) 29(2) 7(2) -11(2) 3(2)

C(27) 28(2) 36(2) 22(2) -1(1) -6(1) 3(2)

C(28) 28(2) 31(2) 28(2) 4(1) -7(1) -2(2)

**Table 19. Anisotropic displacement parameters (A^2 x 10^3) for 4 (CONTINUE).**

C(29) 47(2) 46(2) 51(2) 5(2) -24(2) -16(2)

C(30) 72(3) 39(2) 56(3) 17(2) -31(3) -6(2)

C(31) 29(2) 35(2) 39(2) -13(2) -13(2) 10(2)

C(32) 28(2) 24(2) 29(2) -7(1) -7(1) 9(1)

C(33) 25(2) 23(2) 25(2) -2(1) -1(1) 7(1)

C(34) 29(2) 24(2) 56(2) -7(2) -8(2) 7(1)

C(35) 35(2) 49(3) 95(4) -27(3) -26(3) 9(2)

C(36) 33(2) 30(2) 24(2) -9(1) -6(1) 14(2)

C(37) 25(2) 29(2) 25(2) -6(1) -4(1) 10(1)

C(38) 22(2) 25(2) 21(2) -6(1) -5(1) 7(1)

C(39) 38(2) 44(2) 23(2) -1(2) -9(2) 19(2)

C(40) 72(3) 69(3) 23(2) -16(2) -6(2) 38(3)

C(41) 75(3) 46(2) 32(2) -7(2) 6(2) 20(2)

C(42) 33(2) 33(2) 28(2) 6(1) 0(2) 1(2)

C(43) 70(4) 87(5) 60(3) 9(3) -19(3) -20(3)

C(44) 190(14) 133(10) 134(10) -30(8) -22(10) 25(10)

Cl(1) 64(2) 56(2) 87(3) 27(1) 3(2) -12(1)

Cl(2) 146(8) 88(4) 183(10) -32(4) -24(6) -50(4)

Cl(3) 102(3) 111(4) 37(2) 7(2) 13(2) -47(2)

Cl(1A) 128(9) 212(15) 288(21) 25(12) 18(11) -42(8)

Cl(2A) 83(4) 166(9) 65(3) -41(4) -9(2) 0(5)

Cl(3A) 123(7) 357(27) 99(6) 106(11) -39(5) -104(12)

Cl(4) 308(7) 135(3) 175(4) -18(3) 70(5) -14(4)

Cl(5) 271(6) 143(3) 154(3) -8(2) 61(4) -44(4)

Cl(6) 158(3) 198(4) 157(3) 53(3) 12(3) -6(3)

O(5) 33(1) 34(1) 38(1) 0(1) 3(1) 2(1)

C(45) 57(3) 53(3) 75(4) -17(3) 3(3) 14(2)

O(6) 54(2) 50(2) 58(2) -3(2) 3(2) -11(2)

C(46) 67(4) 89(5) 113(6) -35(5) 3(4) -18(4)

_______________________________________________________________________

**Table 20. Hydrogen coordinates ( x 10^4) and isotropic**

**displacement parameters (A^2 x 10^3) for 4.**

________________________________________________________________

x y z U(eq)

________________________________________________________________

H(2A) 5754(2) 7917(2) 1650(1) 29

H(4D) 2856(2) 7931(1) -1039(1) 29

H(6A) 9632(2) 8160(1) 2076(1) 29

H(8A) 12262(2) 11001(1) 2556(1) 28

H(10D) 10726(2) 12099(2) 1702(2) 35

H(11A) 7984(2) 12051(2) -1060(1) 34

H(13A) 14531(2) 11802(2) 2051(1) 32

H(16A) 17102(2) 8950(1) 2600(1) 28

H(4A) 4046(3) 7633(3) 1660(2) 64

H(4B) 3791(3) 7189(3) 1117(2) 64

H(4C) 3484(3) 7895(3) 1095(2) 64

H(5A) 7503(3) 8138(2) -73(2) 45

H(5B) 6599(3) 8353(2) -460(2) 45

H(5C) 6877(3) 7642(2) -426(2) 45

H(9A) 4934(3) 6298(2) -847(2) 40

H(9B) 5128(3) 6404(2) -155(2) 40

H(9C) 5805(3) 6725(2) -637(2) 40

H(10A) 2928(4) 8846(2) -411(2) 56

H(10B) 4002(4) 8997(2) -202(2) 56

H(10C) 3268(4) 8673(2) 247(2) 56

H(14A) 7903(3) 9889(2) 1587(2) 37

H(14B) 8814(3) 10269(2) 1356(2) 37

**Table 20. Hydrogen coordinates ( x 10^4) and isotropic**

**displacement parameters (A^2 x 10^3) for 4 (CONTINUE).**

H(14C) 8498(3) 10310(2) 2038(2) 37

H(15A) 11313(3) 8173(2) 2354(3) 63

H(15B) 11610(3) 8790(2) 2691(3) 63

H(15C) 11887(3) 8698(2) 2007(3) 63

H(19A) 10923(4) 10818(2) 700(2) 50

H(19B) 9949(4) 10516(2) 939(2) 50

H(19C) 10825(4) 10088(2) 738(2) 50

H(20A) 11928(4) 10309(2) 3373(2) 51

H(20B) 11735(4) 9627(2) 3141(2) 51

H(20C) 10854(4) 10048(2) 3346(2) 51

H(24A) 9000(4) 12329(4) 1727(2) 79

H(24B) 8463(4) 12077(4) 1148(2) 79

H(24C) 8709(4) 12791(4) 1206(2) 79

H(25A) 12478(3) 12031(3) -28(2) 53

H(25B) 11812(3) 12531(3) -346(2) 53

H(25C) 11584(3) 11816(3) -425(2) 53

H(29A) 9740(4) 13803(3) -721(2) 58

H(29B) 10647(4) 13427(3) -480(2) 58

H(29C) 9858(4) 13680(3) -25(2) 58

H(30A) 8177(5) 11113(2) -471(3) 67

H(30B) 8442(5) 11260(2) 205(3) 67

H(30C) 9262(5) 11039(2) -245(3) 67

H(34A) 12944(3) 10096(2) 1366(2) 44

H(34B) 13490(3) 9639(2) 1809(2) 44

H(34C) 13904(3) 9755(2) 1156(2) 44

H(35A) 16180(4) 11773(3) 2447(3) 72

H(35B) 16813(4) 11267(3) 2114(3) 72

H(35C) 16414(4) 11136(3) 2768(3) 72

H(39A) 16223(3) 9256(2) 648(2) 42

H(39B) 16106(3) 9981(2) 728(2) 42

H(39C) 15196(3) 9540(2) 811(2) 42

H(40A) 16479(4) 9555(3) 3420(2) 66

H(40B) 15401(4) 9777(3) 3294(2) 66

H(40C) 16273(4) 10252(3) 3238(2) 66

H(43A) 6937 9988 -830 87

H(44A) 5005 8276 3287 183

H(45A) 10635(4) 6662(3) 2216(3) 74

H(45B) 10202(4) 6915(3) 1606(3) 74

H(45C) 9643(4) 6396(3) 1968(3) 74

H(46A) 6381(6) 5724(4) 1172(5) 107

H(46B) 5822(6) 6350(4) 1040(5) 107

H(46C) 5675(6) 6007(4) 1661(5) 107

________________________________________________________________
